# Supplementary material for: Joint retrieval of surface reflectance and aerosol properties with continuous variation of the state variables in the solution space – Part 1: theoretical concept
Source: Copernicus journal article supplement (doi:10.5194/amt-11-6589-2018), 2018-12-14
Supplement: Supplementary file 10 [file amt-11-6589-2018-supplement.zip]

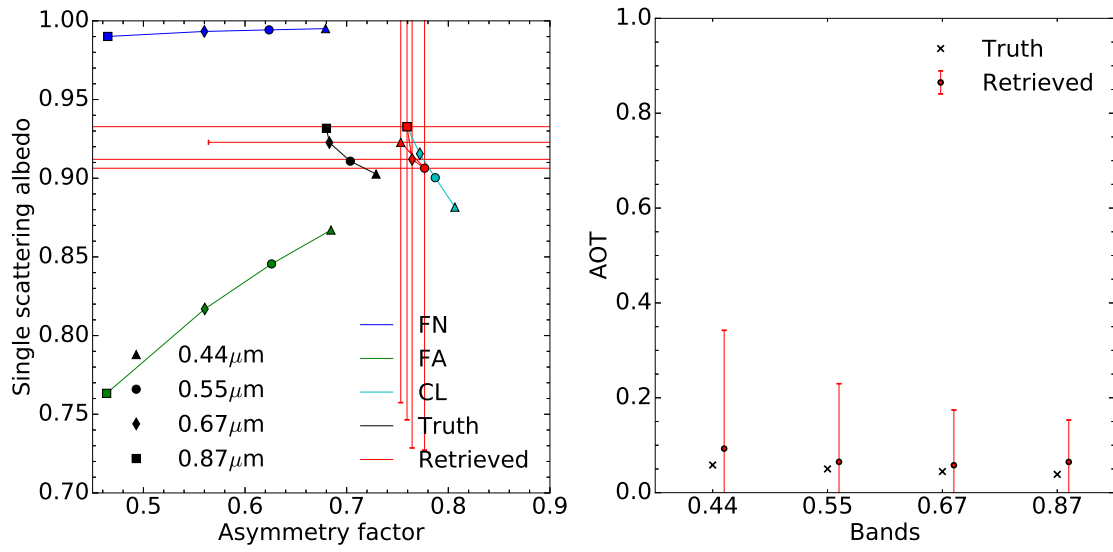

Figure S1 – Same as Fig. (11) but for AOT at  $0.55\mu\text{m}$  equal to 0.05 and a 3% Gaussian noise added to the simulated TOA BRF.

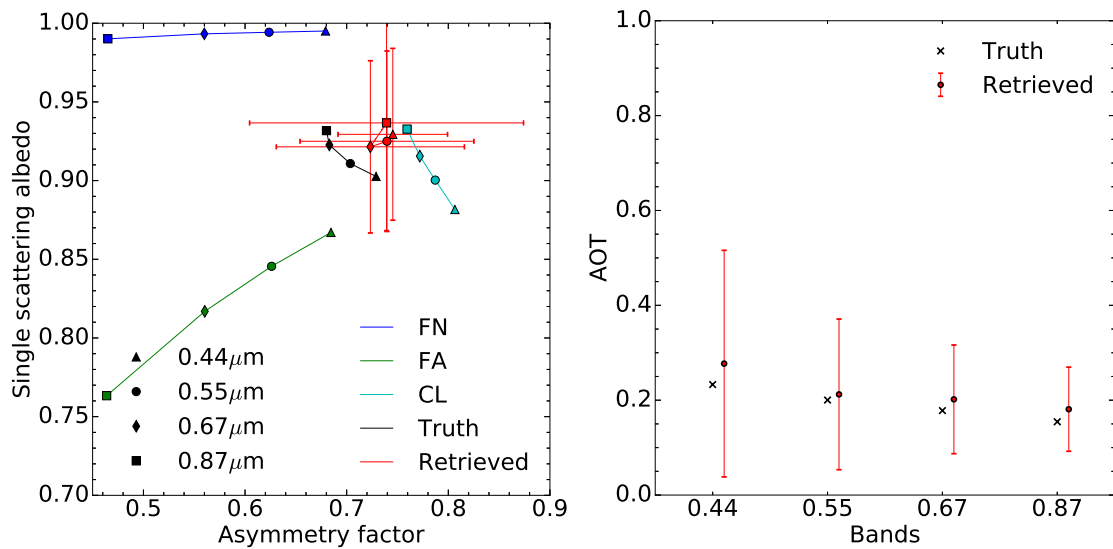

Figure S2 – Same as Fig. (11) but for AOT at  $0.55\mu\text{m}$  equal to 0.2 and a 3% Gaussian noise added to the simulated TOA BRF.

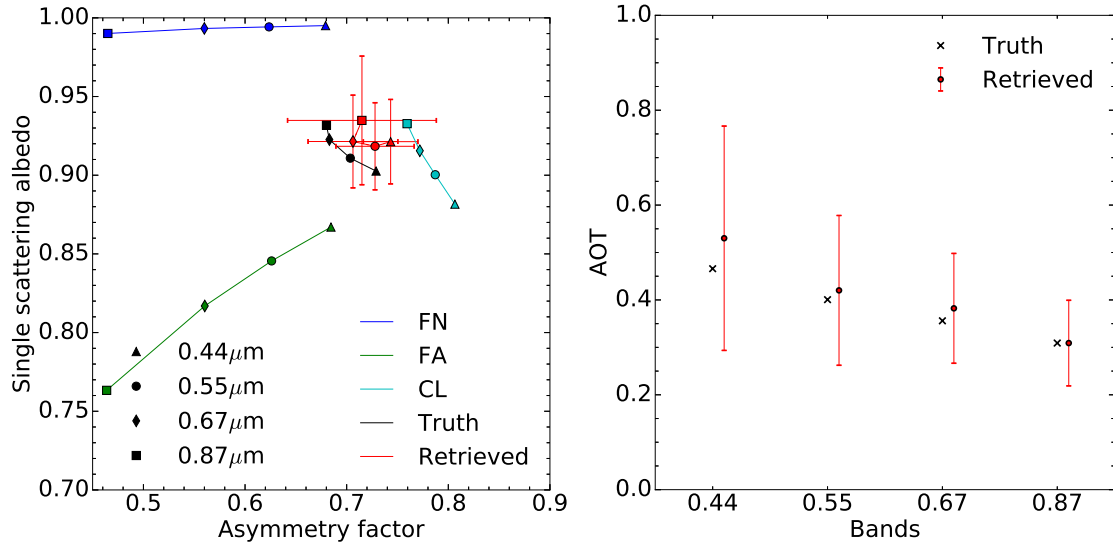

Figure S3 – Same as Fig. (11) but for AOT at  $0.55\mu\text{m}$  equal to 0.4 and a 3% Gaussian noise added to the simulated TOA BRF.

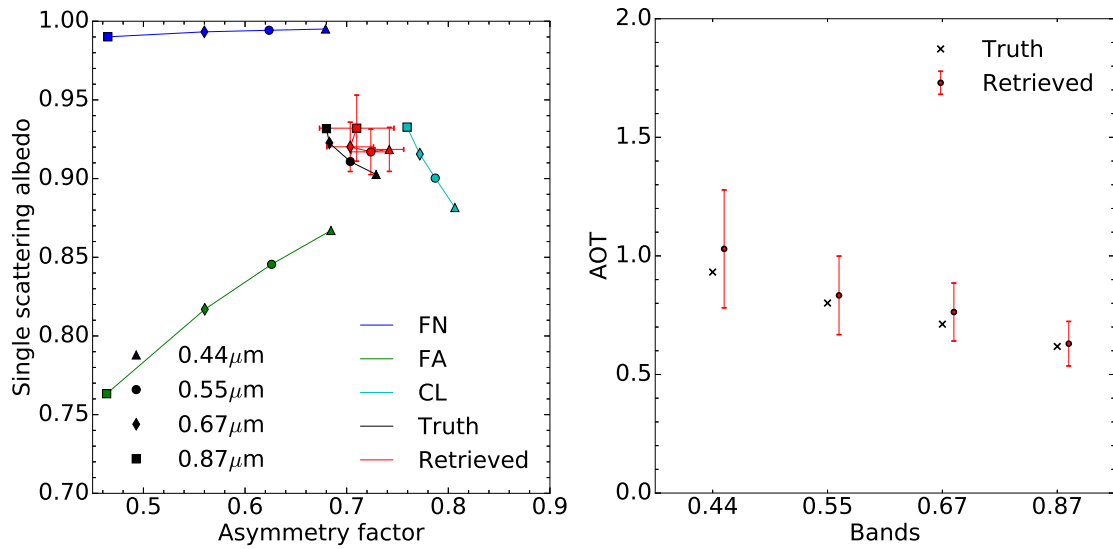

Figure S4 – Same as Fig. (11) but for AOT at  $0.55\mu\text{m}$  equal to 0.8 and a 3% Gaussian noise added to the simulated TOA BRF.

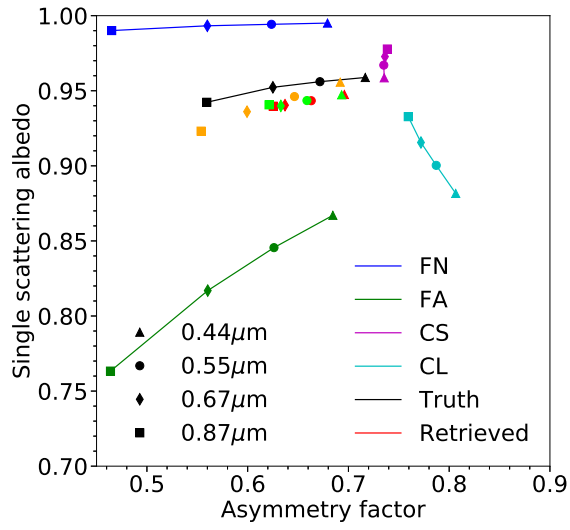

Figure S5 – Merged results for experiments F11 (lime), F12 (orange) and F13 (red).

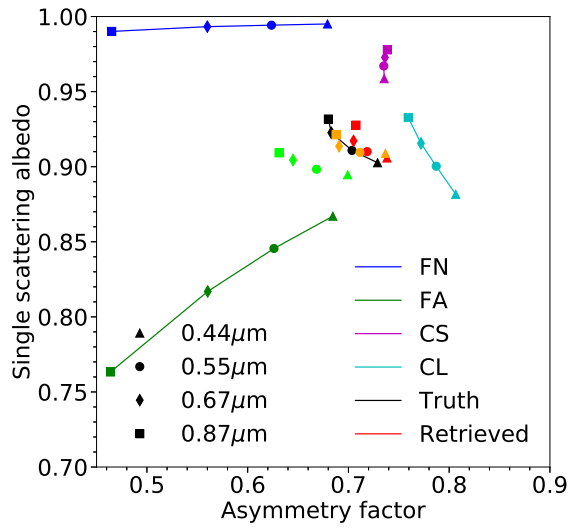

Figure S6 – Merged results for experiments F21 (lime), F22 (orange) and F23 (red).
