# Supplementary material for: Joint retrieval of surface reflectance and aerosol properties with continuous variation of the state variables in the solution space – Part 1: theoretical concept
Source: Copernicus journal article supplement (doi:10.5194/amt-11-6589-2018), 2018-12-14
Supplement: Supplementary file 12 [file amt-11-6589-2018-supplement.zip]

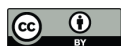

## *Supplement of*

# **Joint retrieval of surface reflectance and aerosol properties with continuous variation of the state variables in the solution space – Part 1: theoretical concept**

**Yves Govaerts and Marta Luffarelli**

*Correspondence to:* Yves Govaerts (yves.govaerts@rayference.eu)

- amt-11-6589-2018-supplement-title-page.pdf
- CISAR\_R4\_supplement.pdf
- suppl
  - .DS\_Store
  - EXP\_F22\_2005\_005\_G-SSA-eps-converted-to.pdf
  - EXP\_F22\_2005\_005\_G-SSA.eps
  - EXP\_F22\_2005\_005\_TOTAOT-eps-converted-to.pdf
  - EXP\_F22\_2005\_005\_TOTAOT.eps
  - EXP\_F22\_2005\_020\_G-SSA-eps-converted-to.pdf
  - EXP\_F22\_2005\_020\_G-SSA.eps
  - EXP\_F22\_2005\_020\_TOTAOT-eps-converted-to.pdf
  - EXP\_F22\_2005\_020\_TOTAOT.eps
  - EXP\_F22\_2005\_040\_G-SSA-eps-converted-to.pdf
  - EXP\_F22\_2005\_040\_G-SSA.eps
  - EXP\_F22\_2005\_040\_TOTAOT-eps-converted-to.pdf
  - EXP\_F22\_2005\_040\_TOTAOT.eps
  - EXP\_F22\_2005\_080\_G-SSA-eps-converted-to.pdf
  - EXP\_F22\_2005\_080\_G-SSA.eps
  - EXP\_F22\_2005\_080\_TOTAOT-eps-converted-to.pdf
  - EXP\_F22\_2005\_080\_TOTAOT.eps
  - MERGED\_EXP\_F13\_G-SSA-eps-converted-to.pdf
  - MERGED\_EXP\_F13\_G-SSA.eps
  - MERGED\_EXP\_F23\_G-SSA-eps-converted-to.pdf
  - MERGED\_EXP\_F23\_G-SSA.eps

The copyright of individual parts of the supplement might differ from the CC BY 3.0 License.
