# Supplementary figures and images for: Joint retrieval of surface reflectance and aerosol properties with continuous variation of the state variables in the solution space – Part 1: theoretical concept
Source: Copernicus journal article supplement (doi:10.5194/amt-11-6589-2018), 2018-12-14

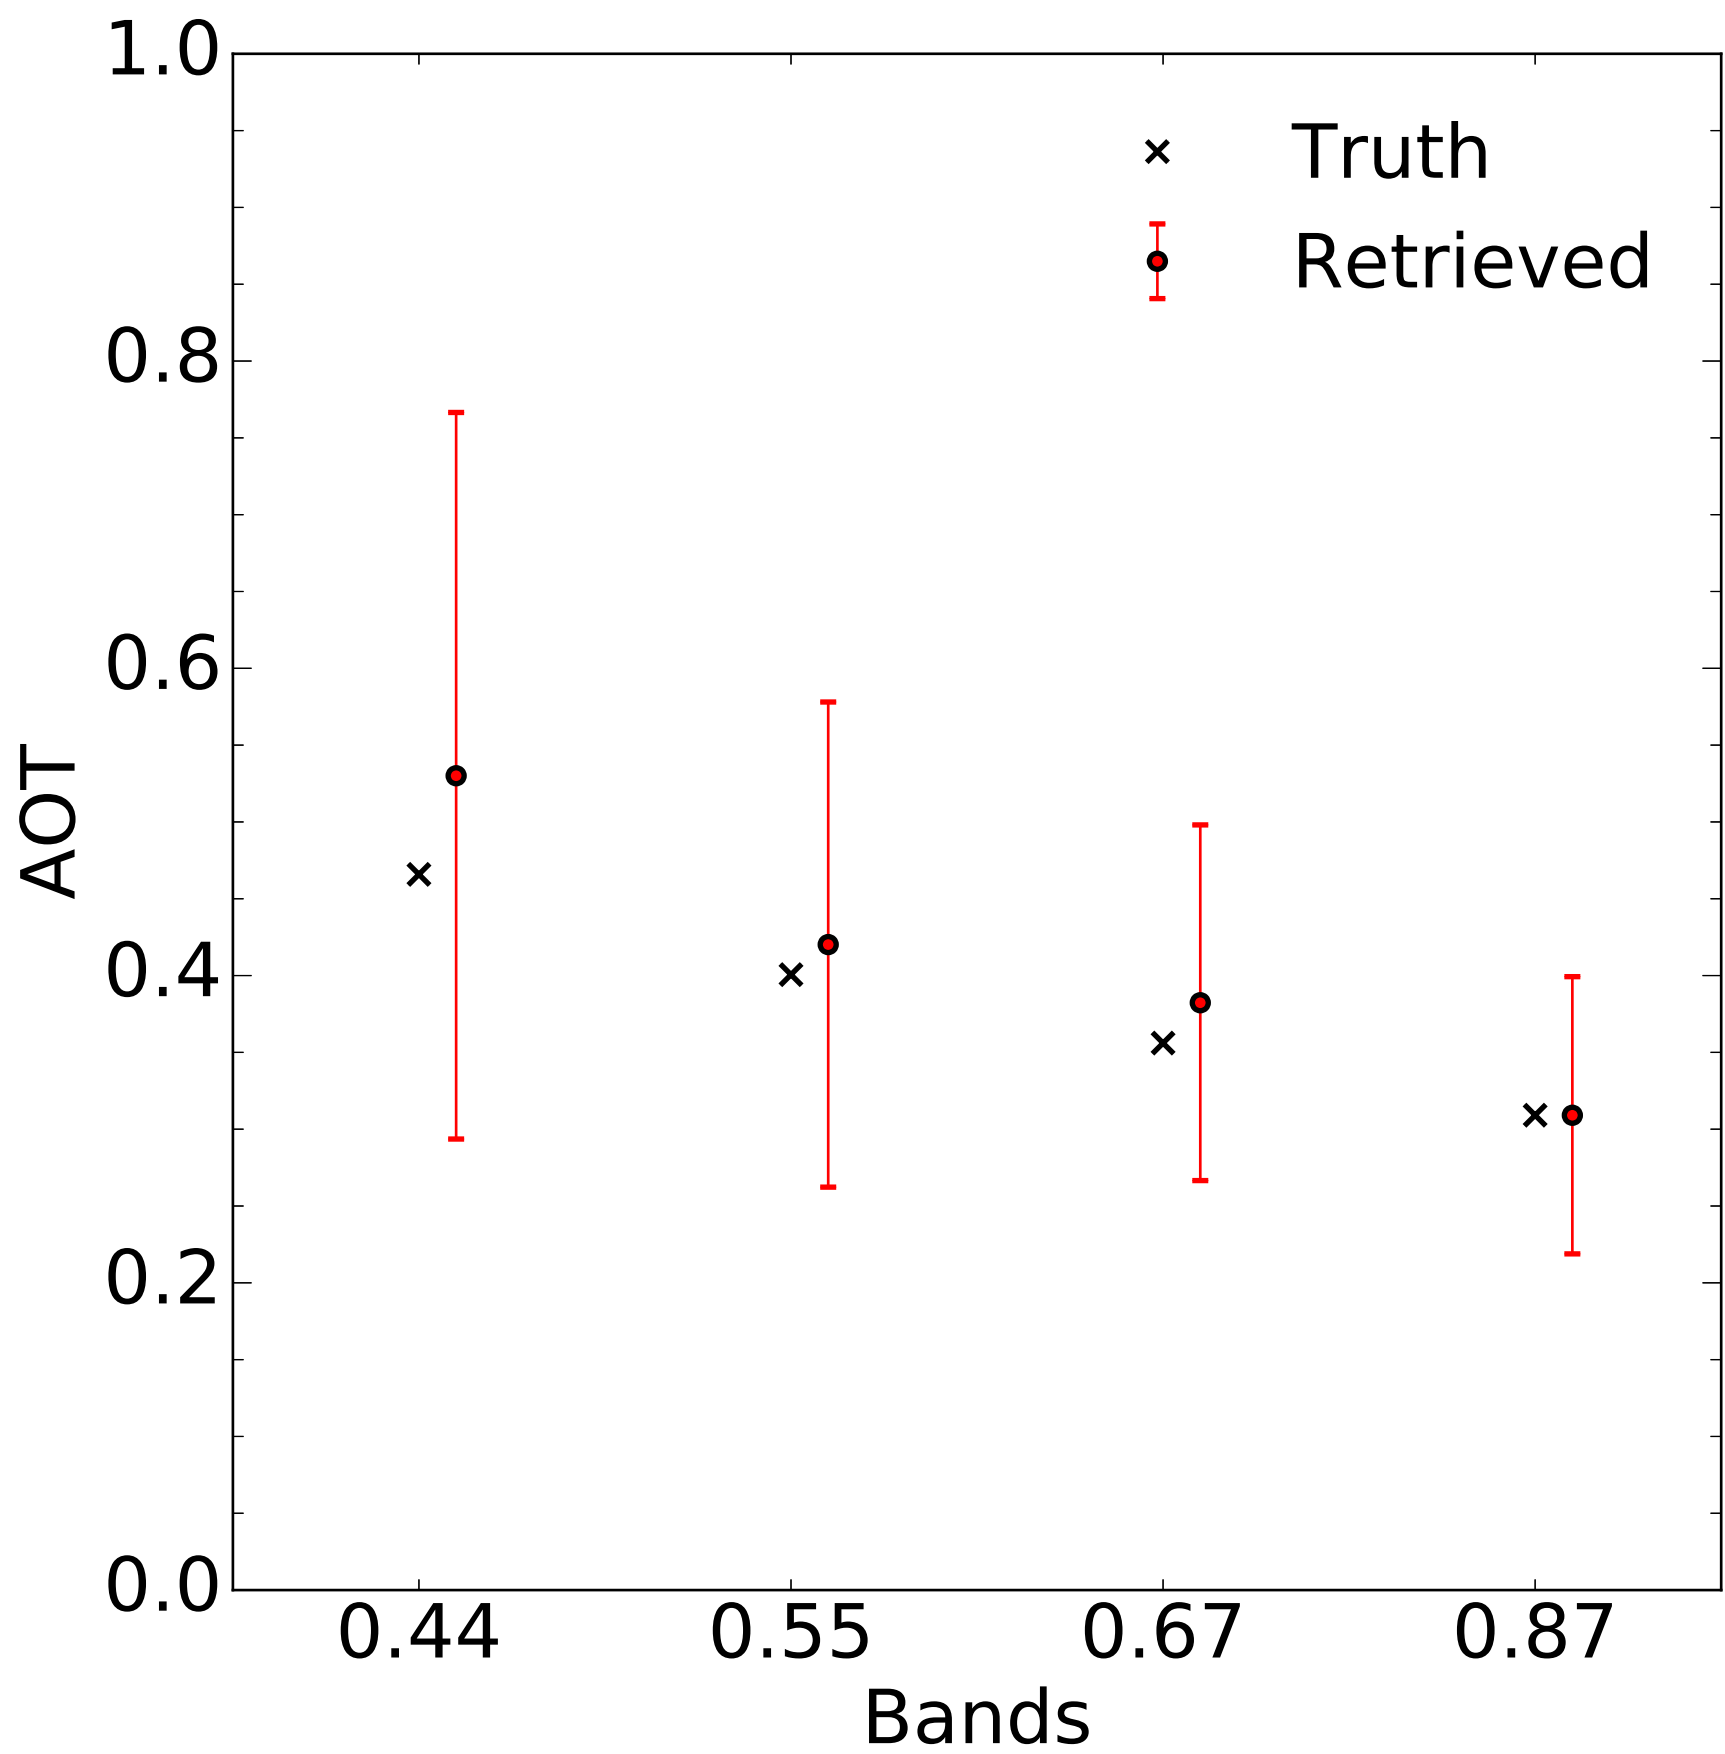

Supplement: Supplementary file 1 [file amt-11-6589-2018-supplement.zip]

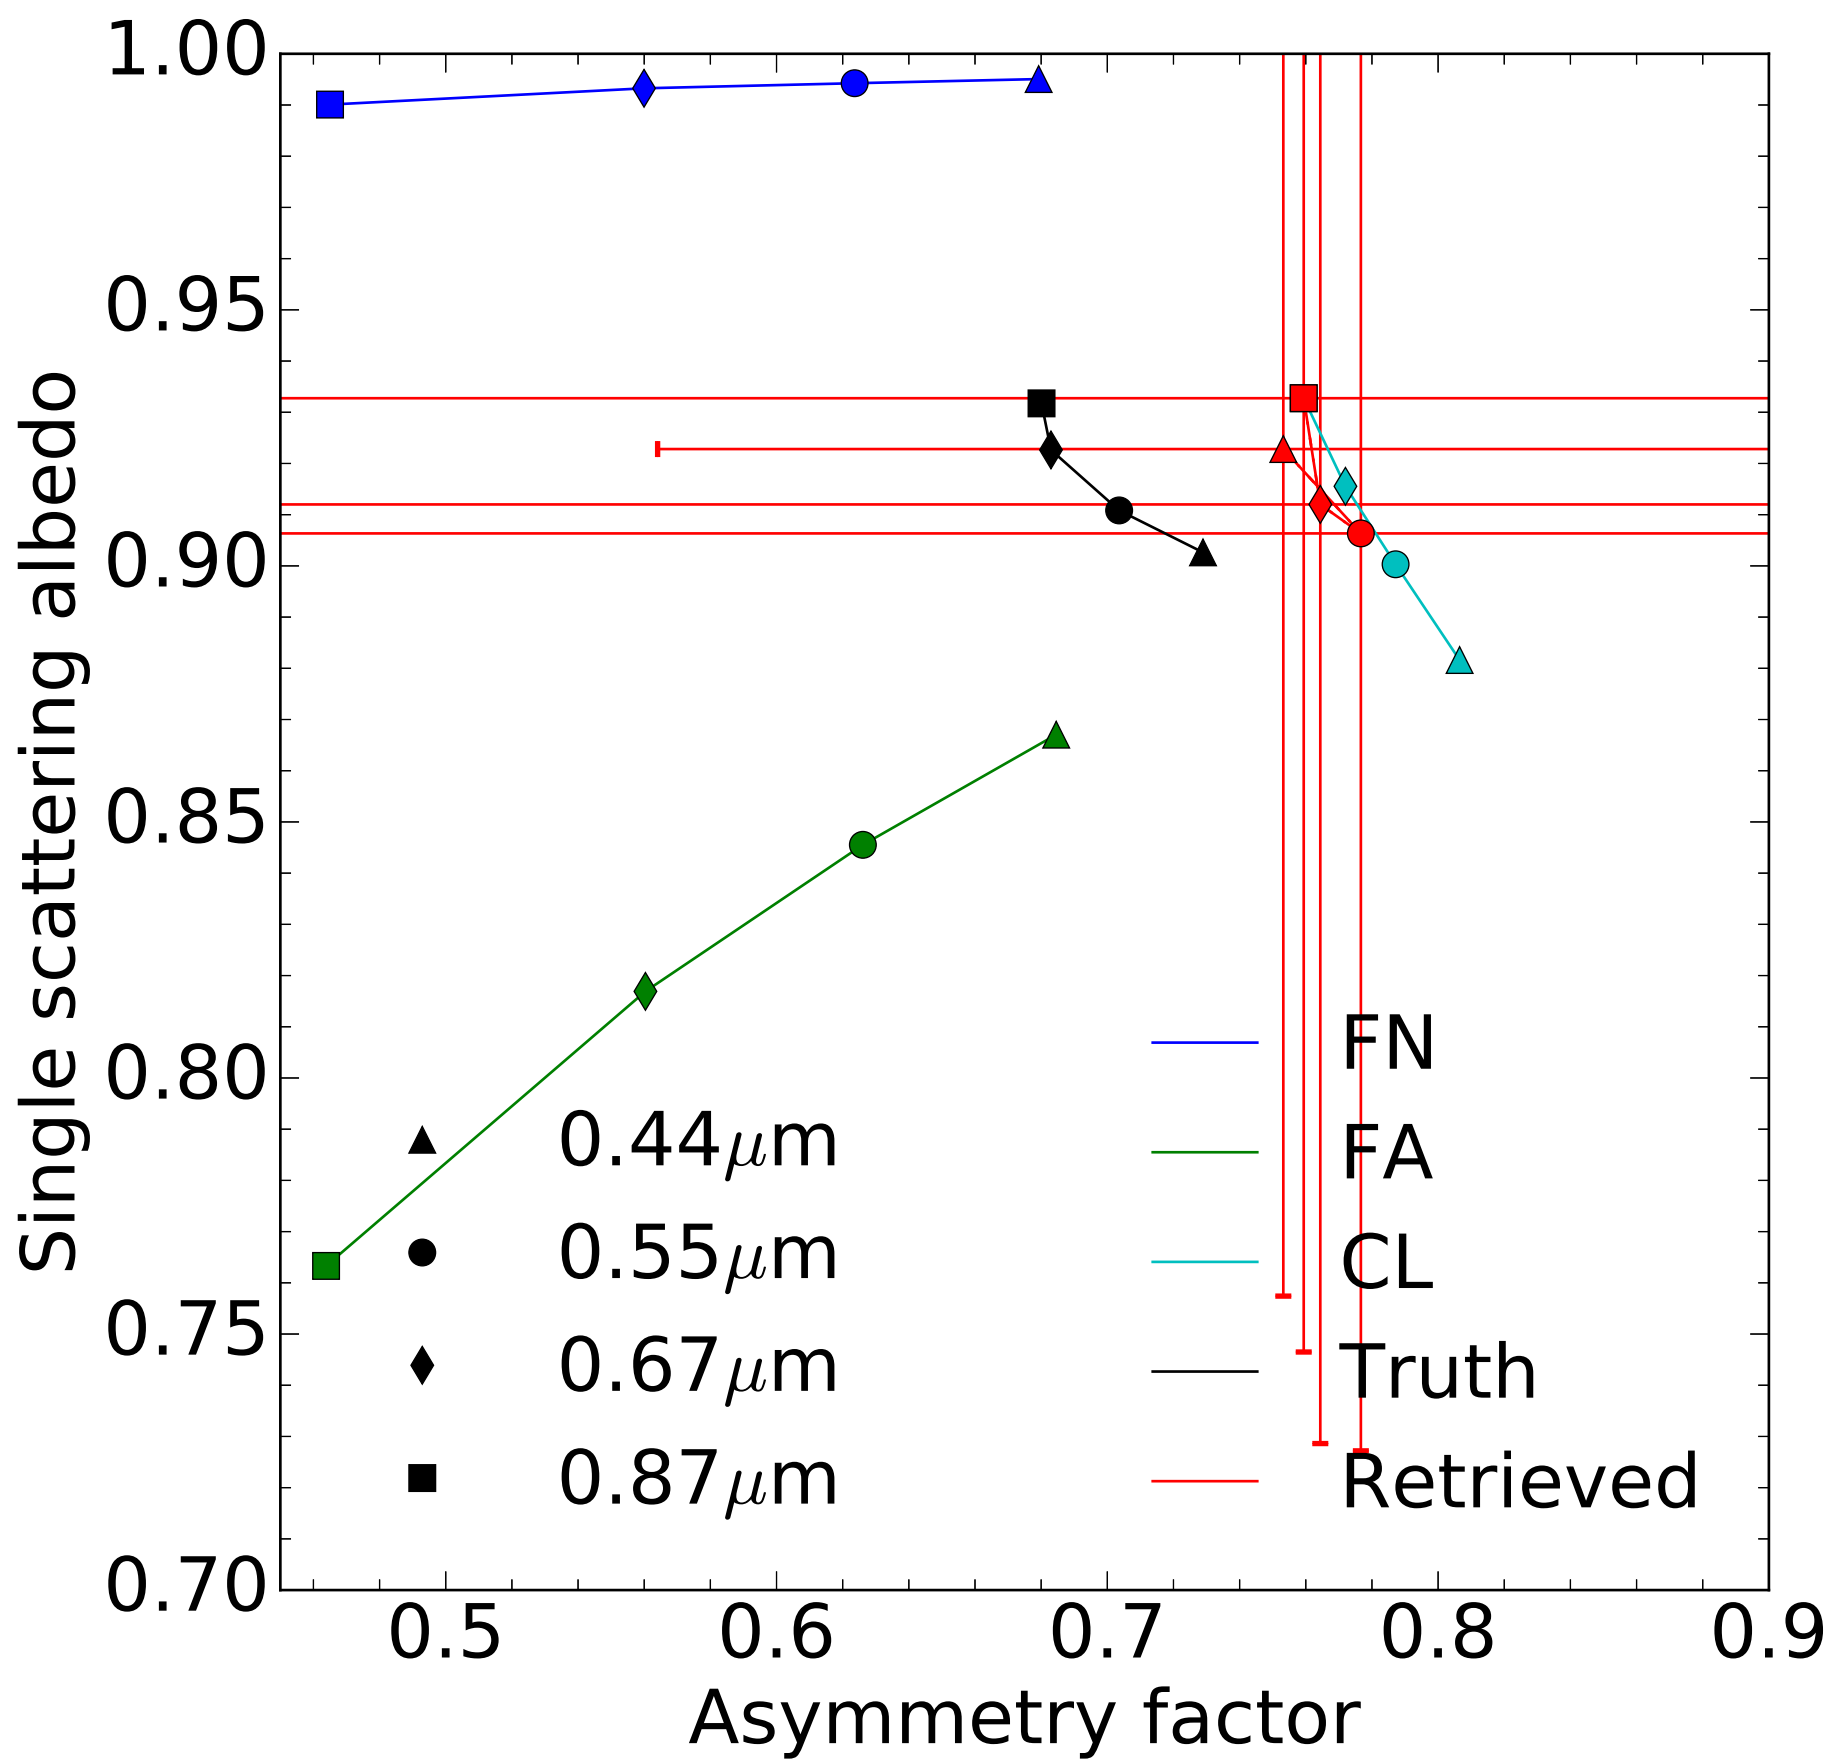

Supplement: Supplementary file 2 [file amt-11-6589-2018-supplement.zip]

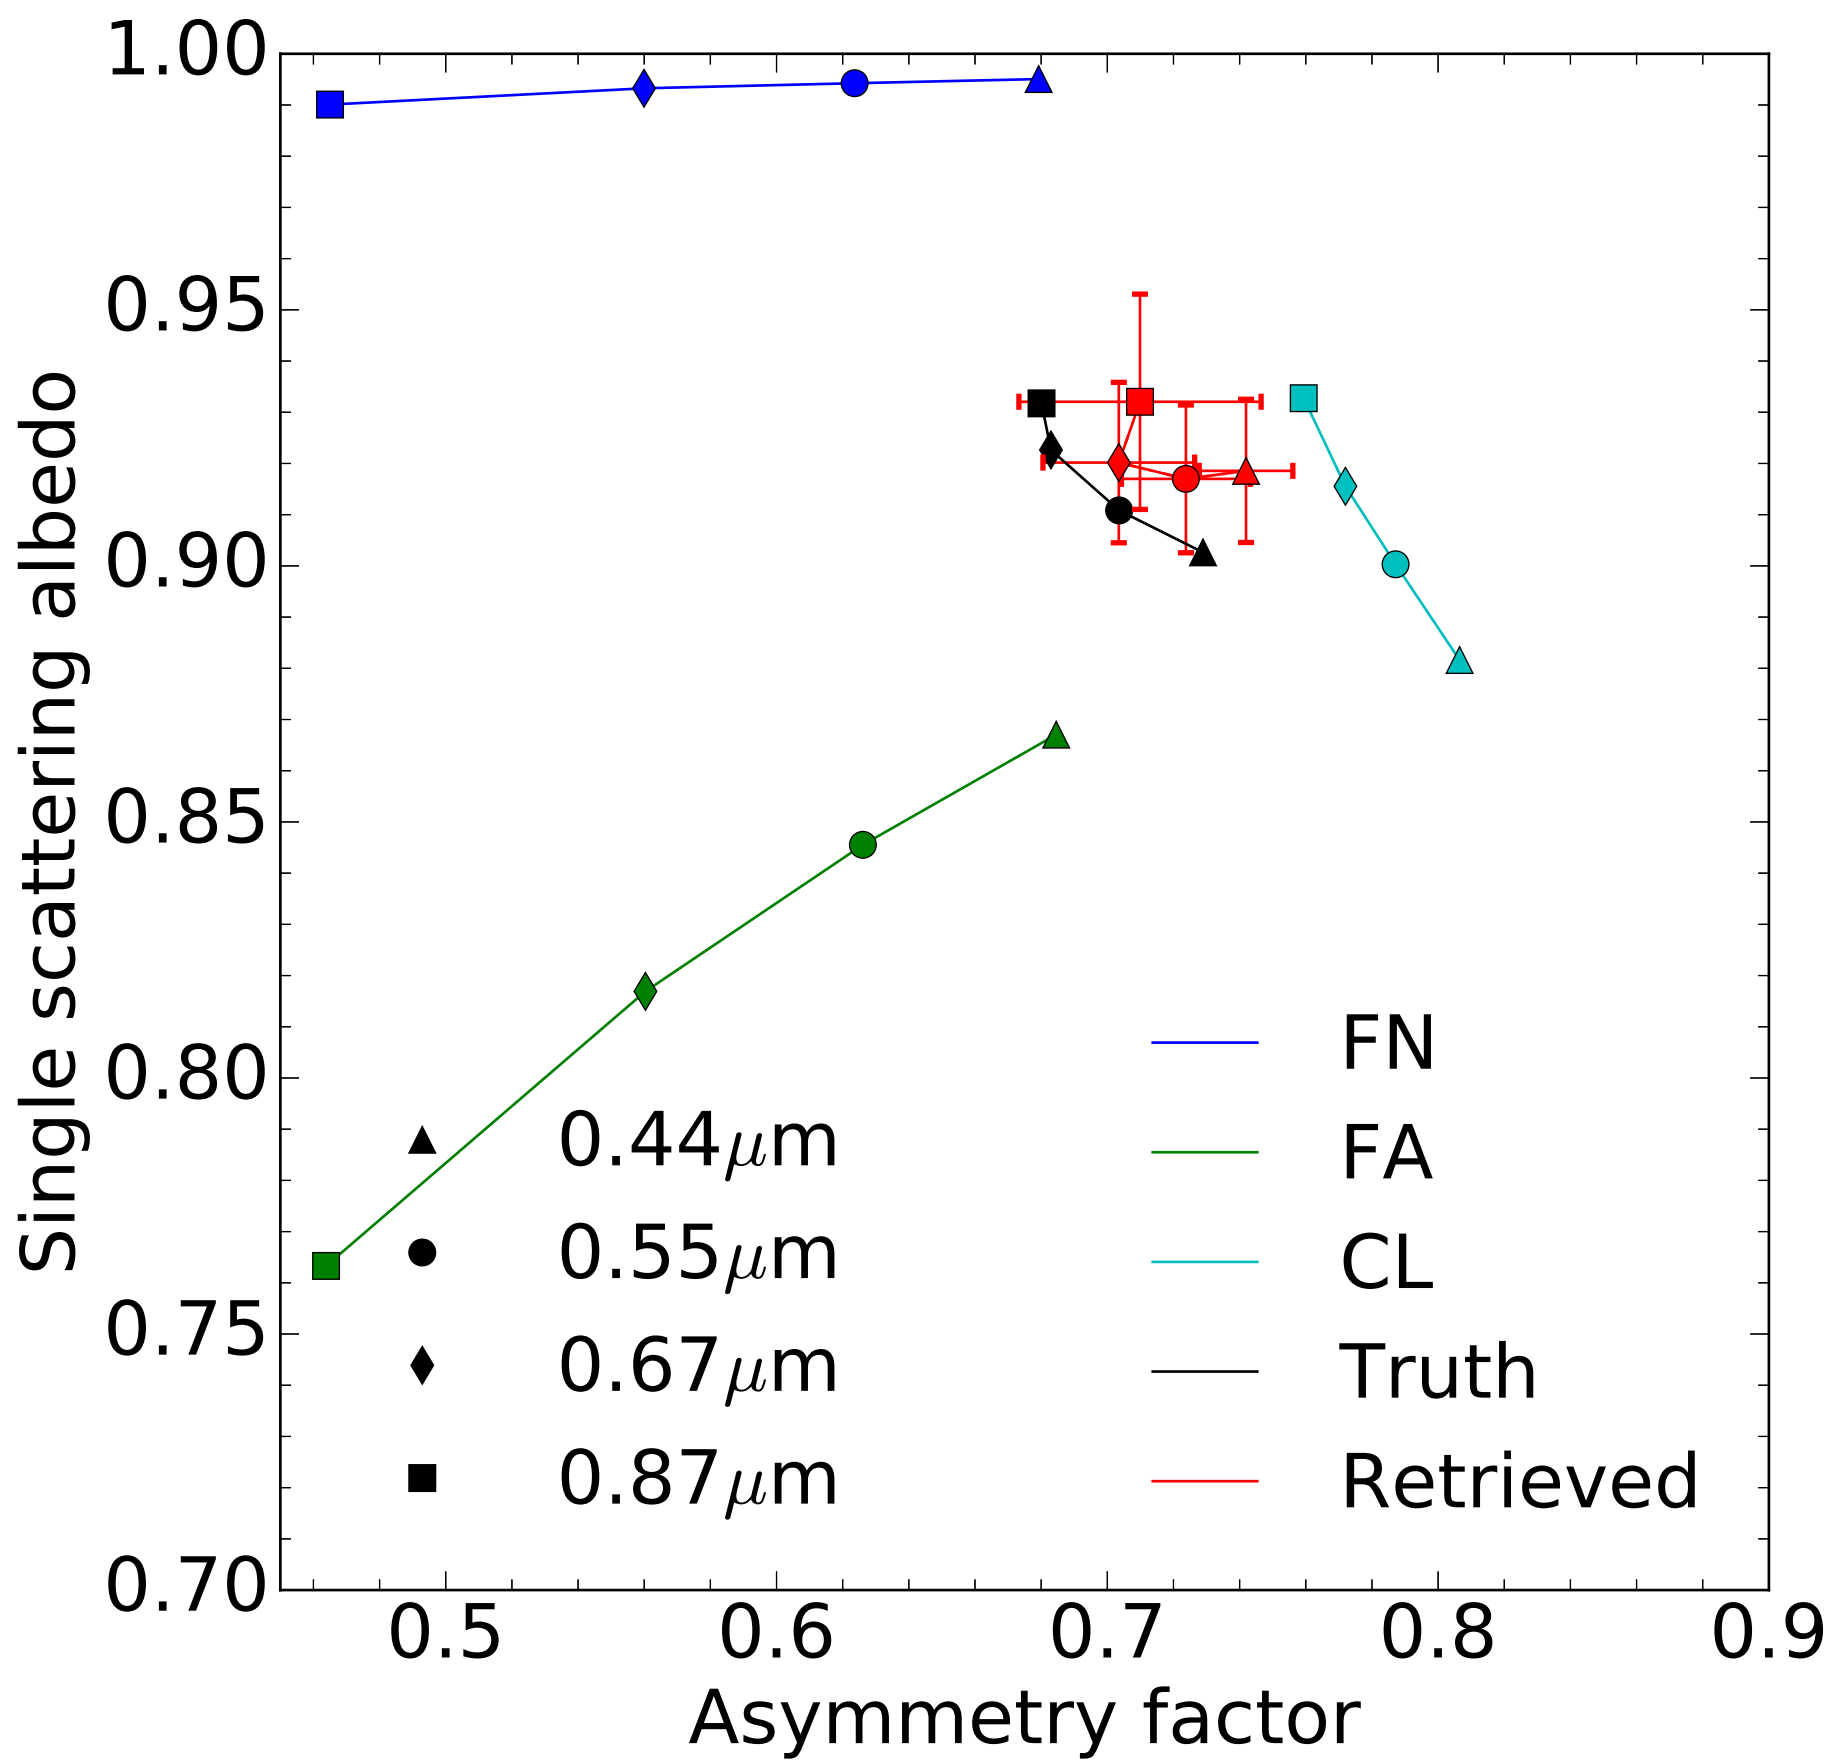

Supplement: Supplementary file 3 [file amt-11-6589-2018-supplement.zip]

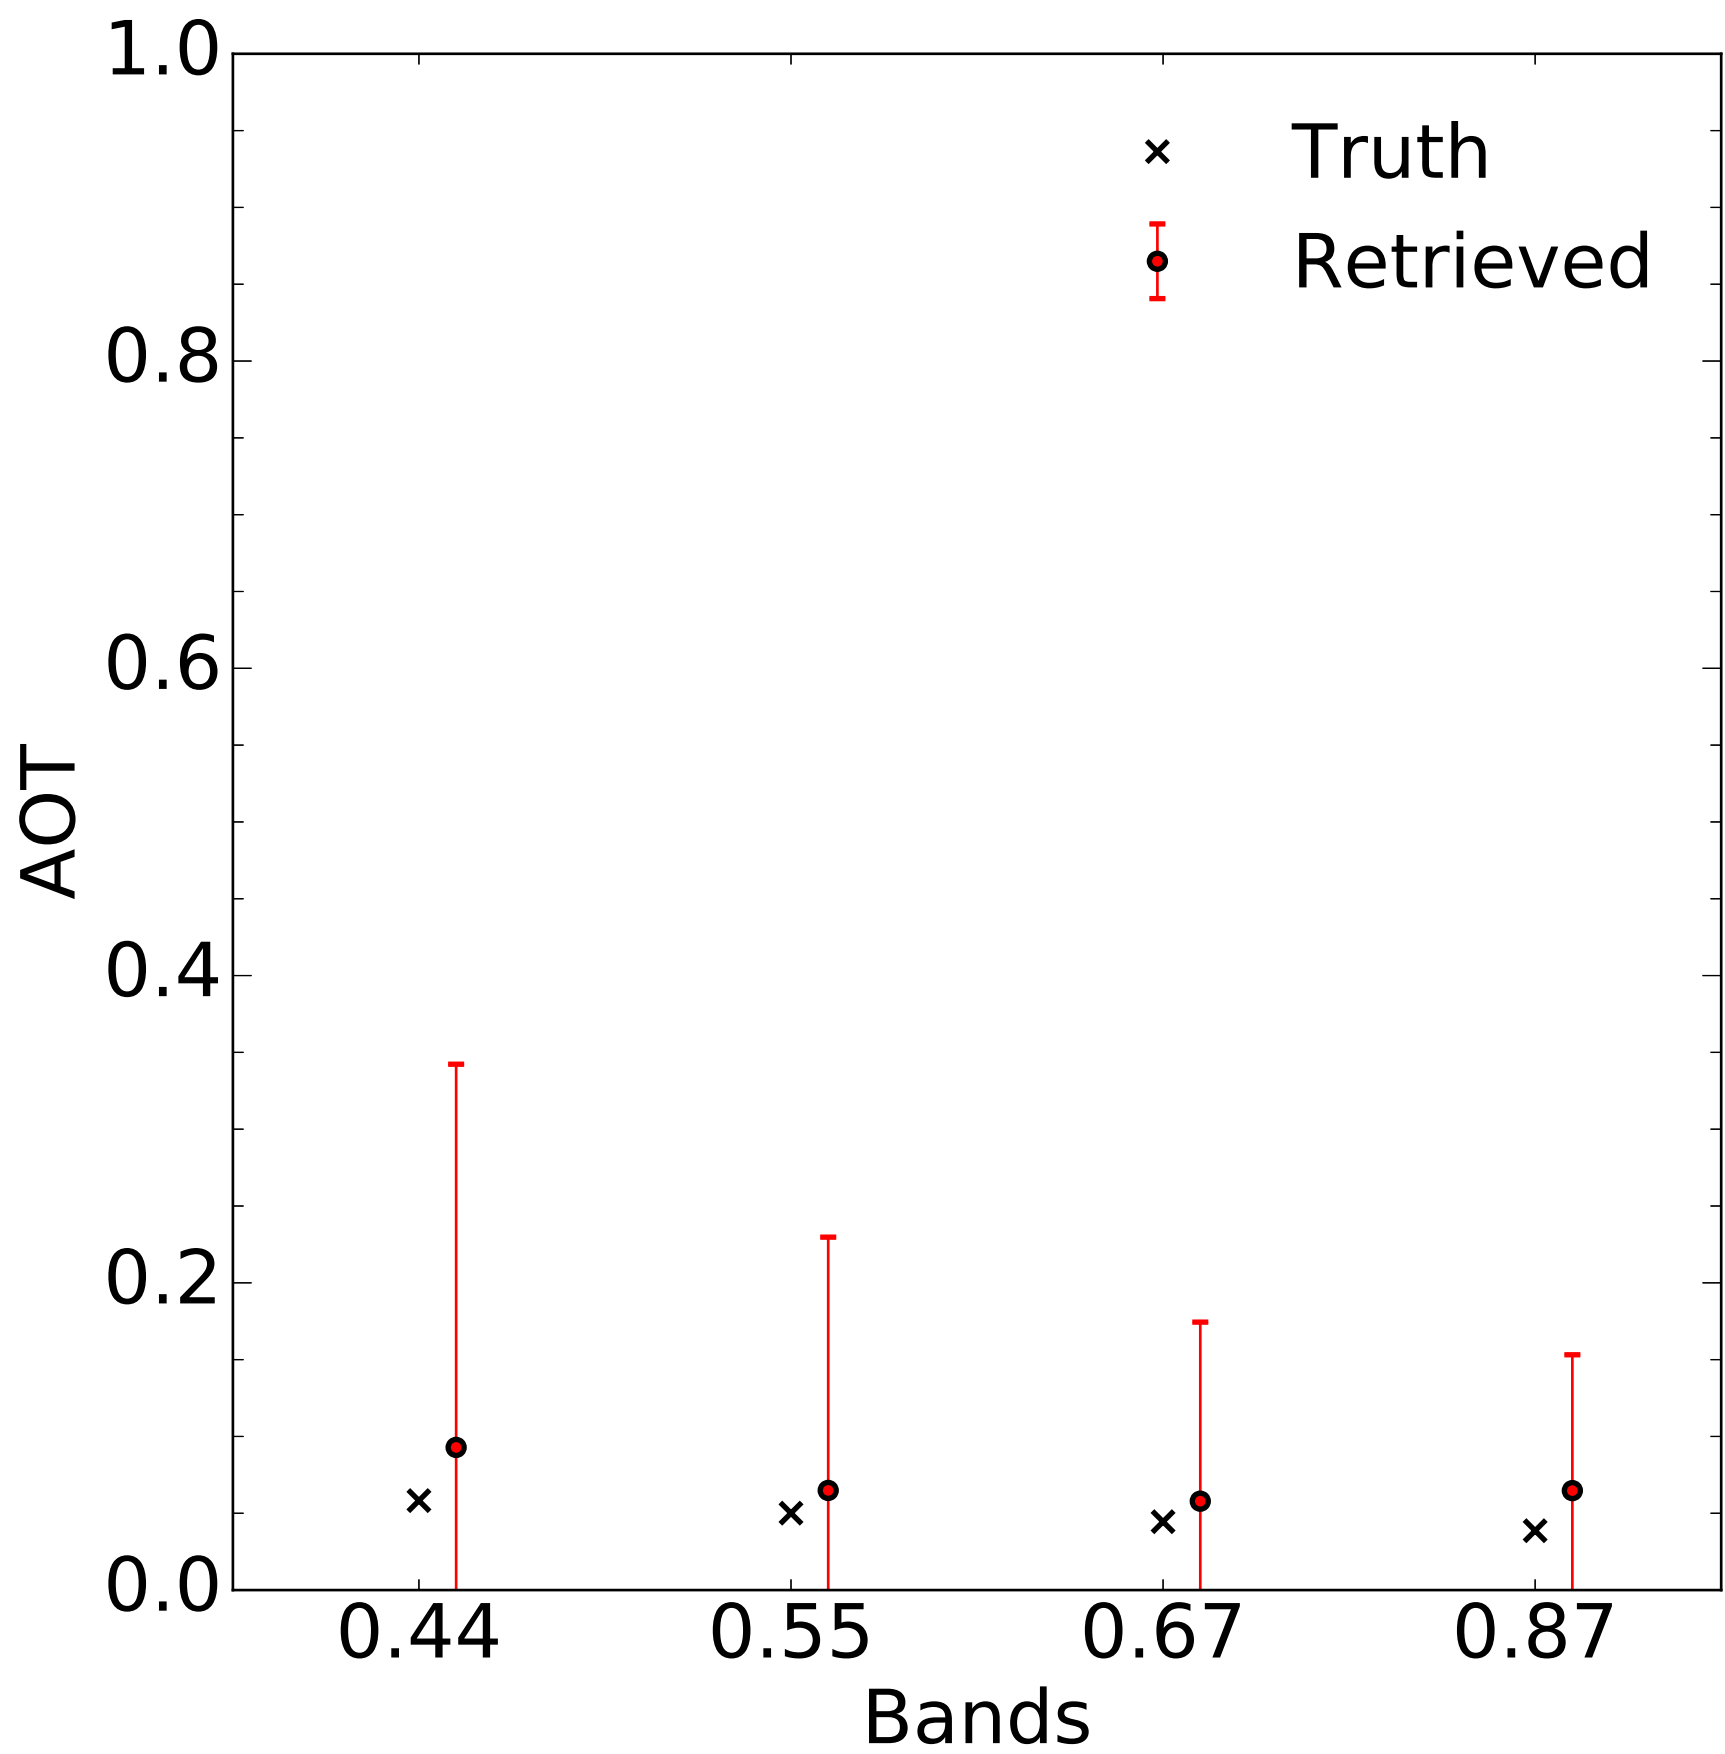

Supplement: Supplementary file 4 [file amt-11-6589-2018-supplement.zip]

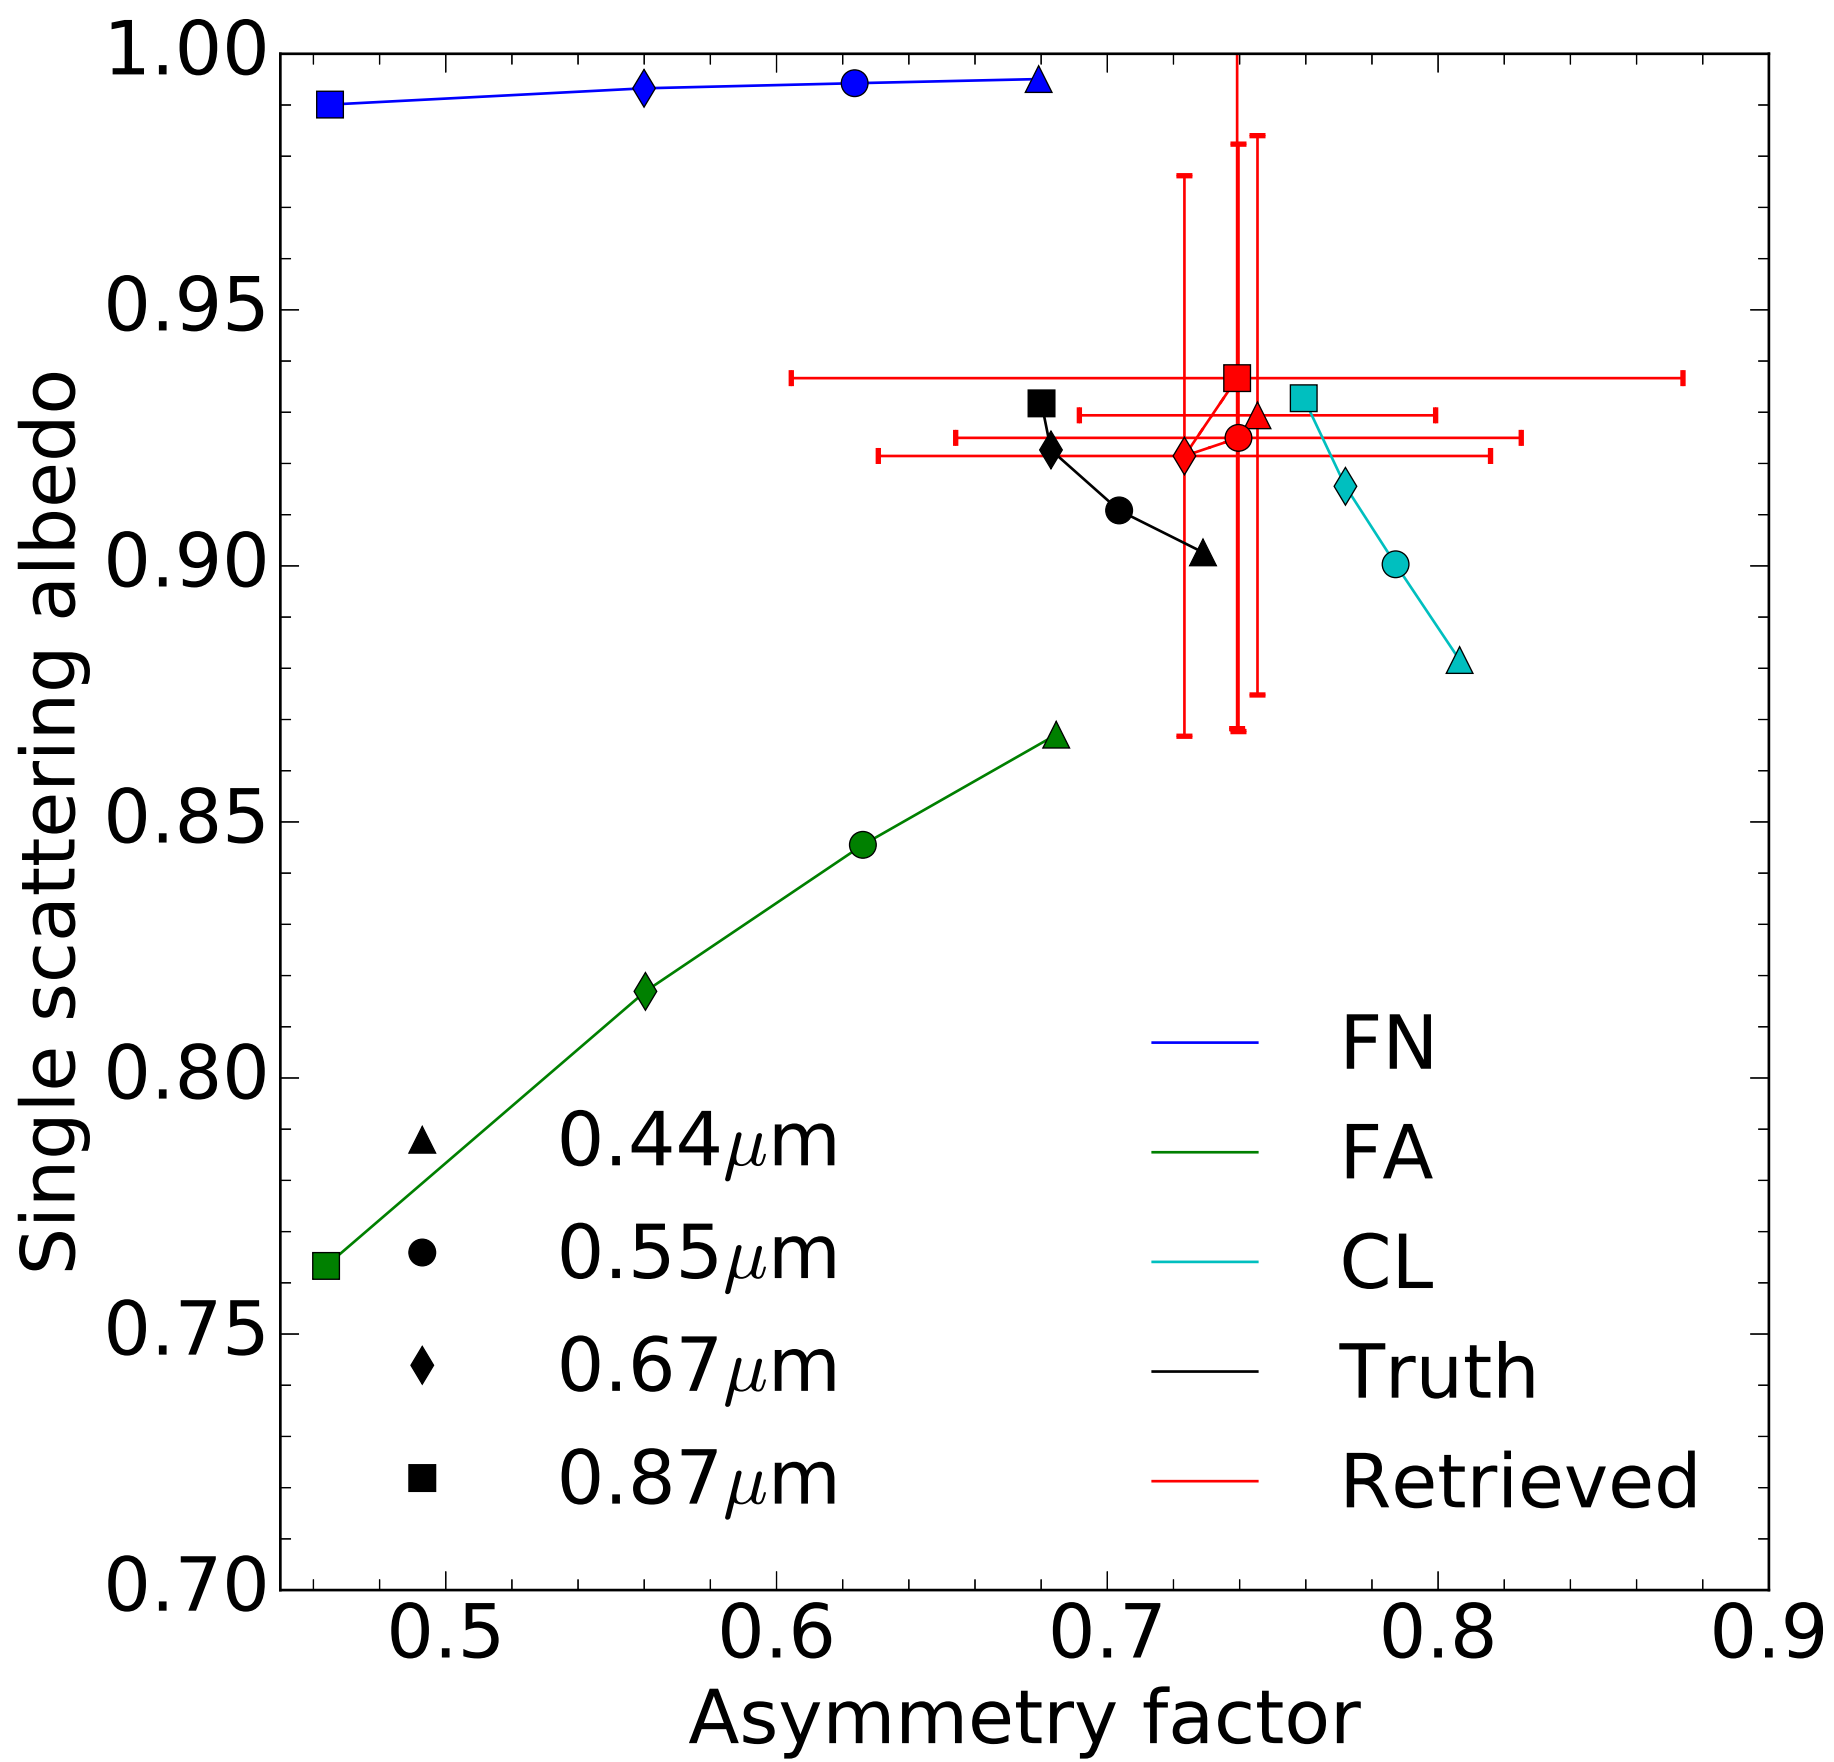

Supplement: Supplementary file 5 [file amt-11-6589-2018-supplement.zip]

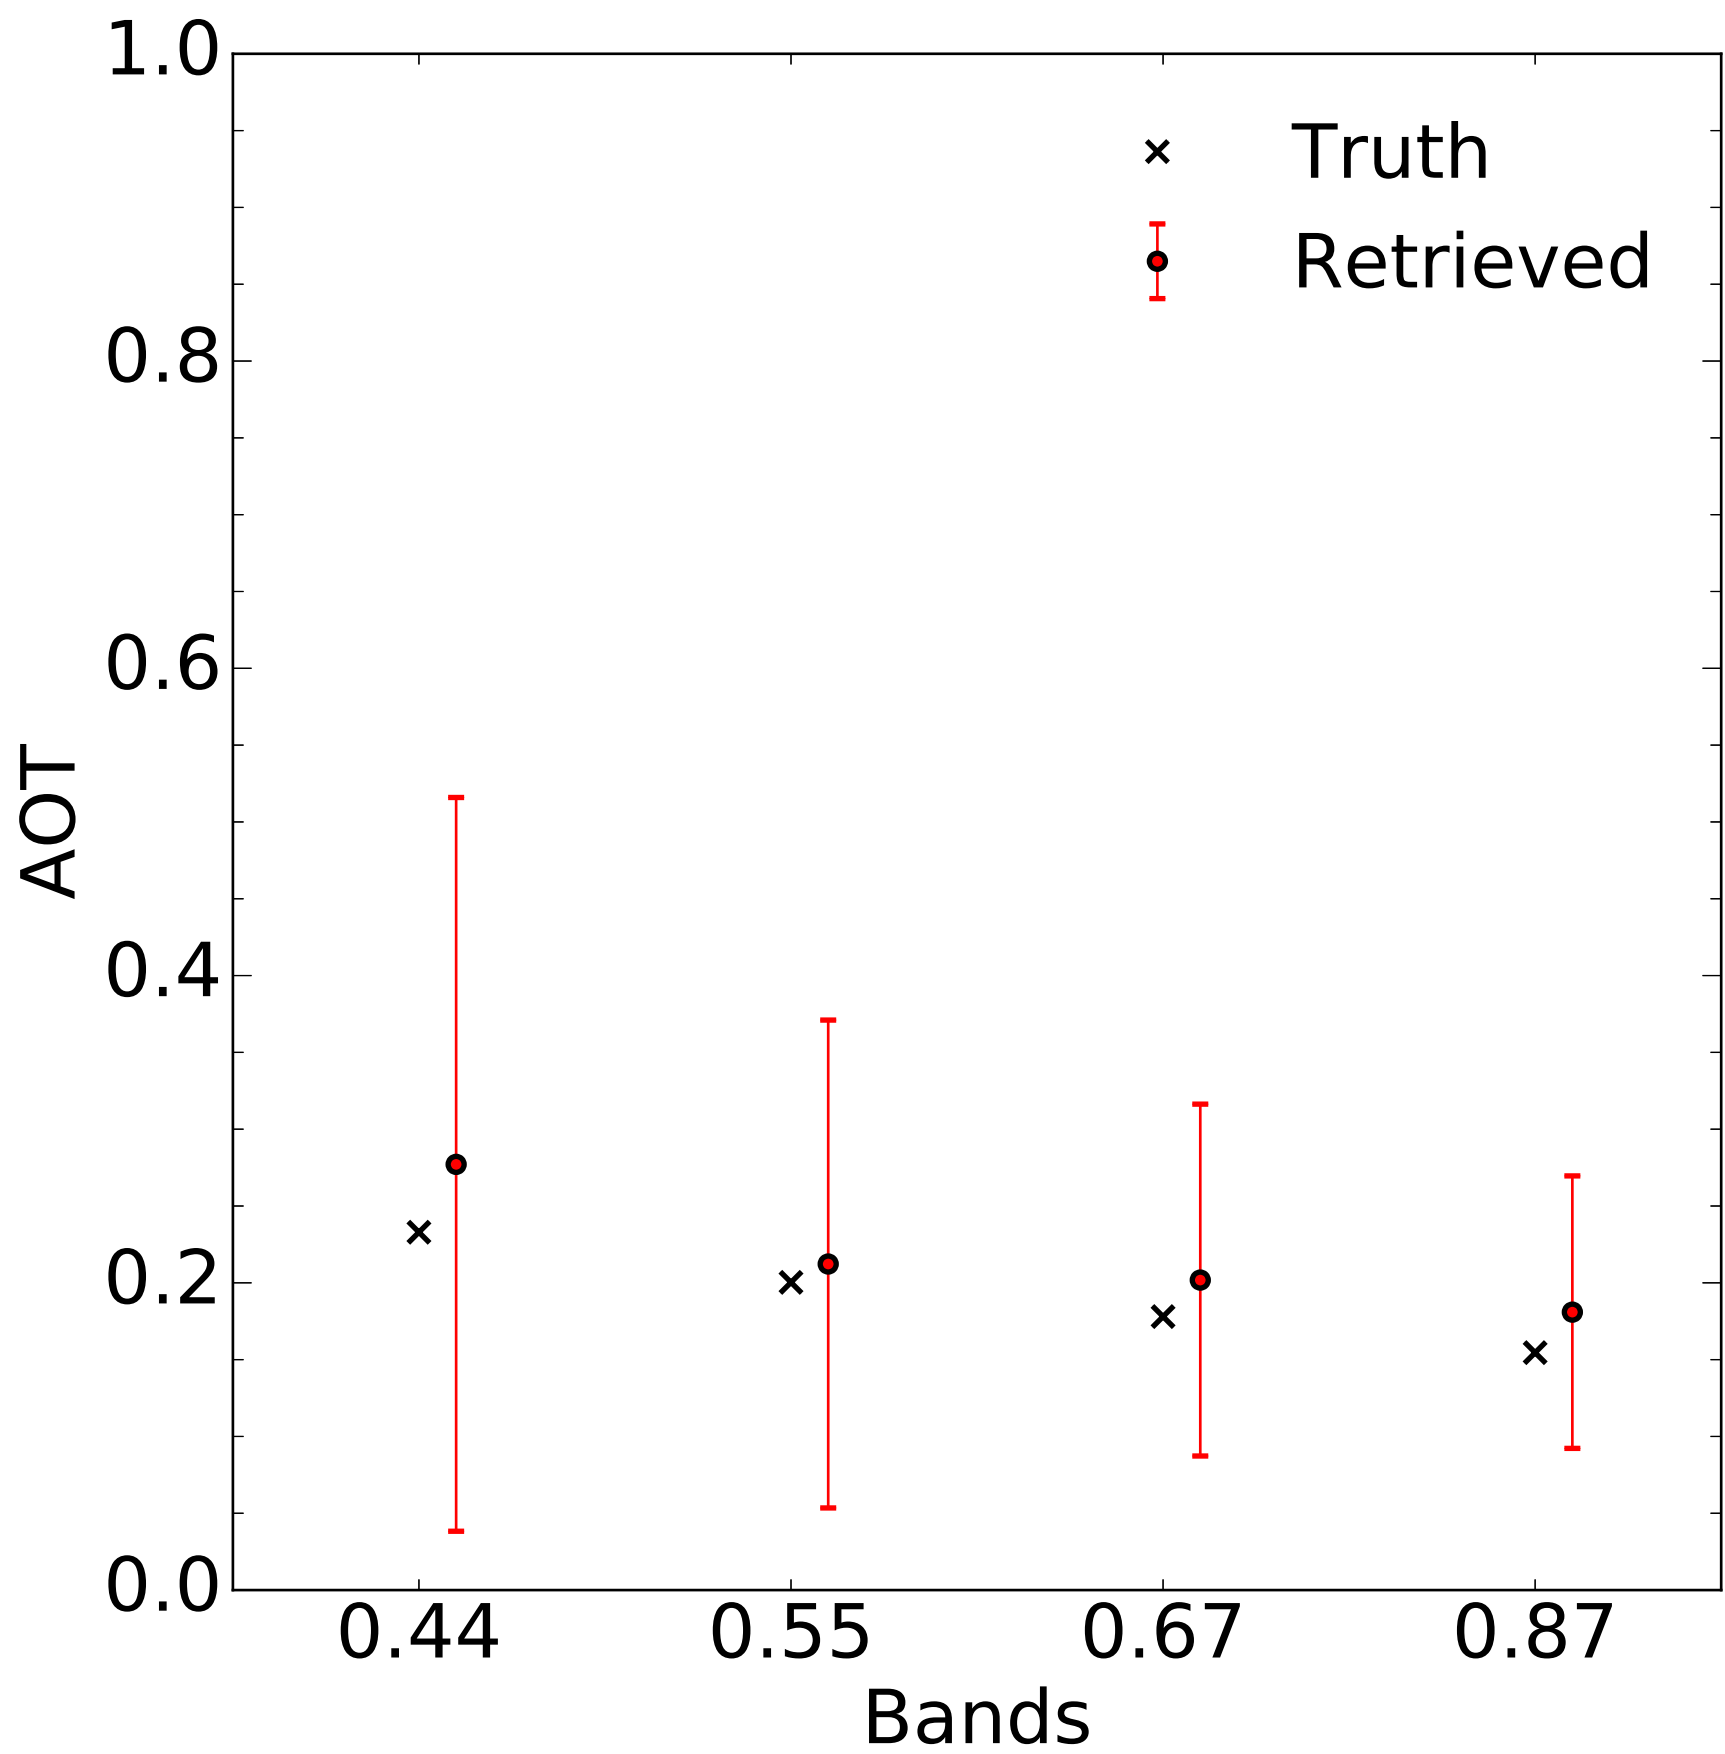

Supplement: Supplementary file 6 [file amt-11-6589-2018-supplement.zip]

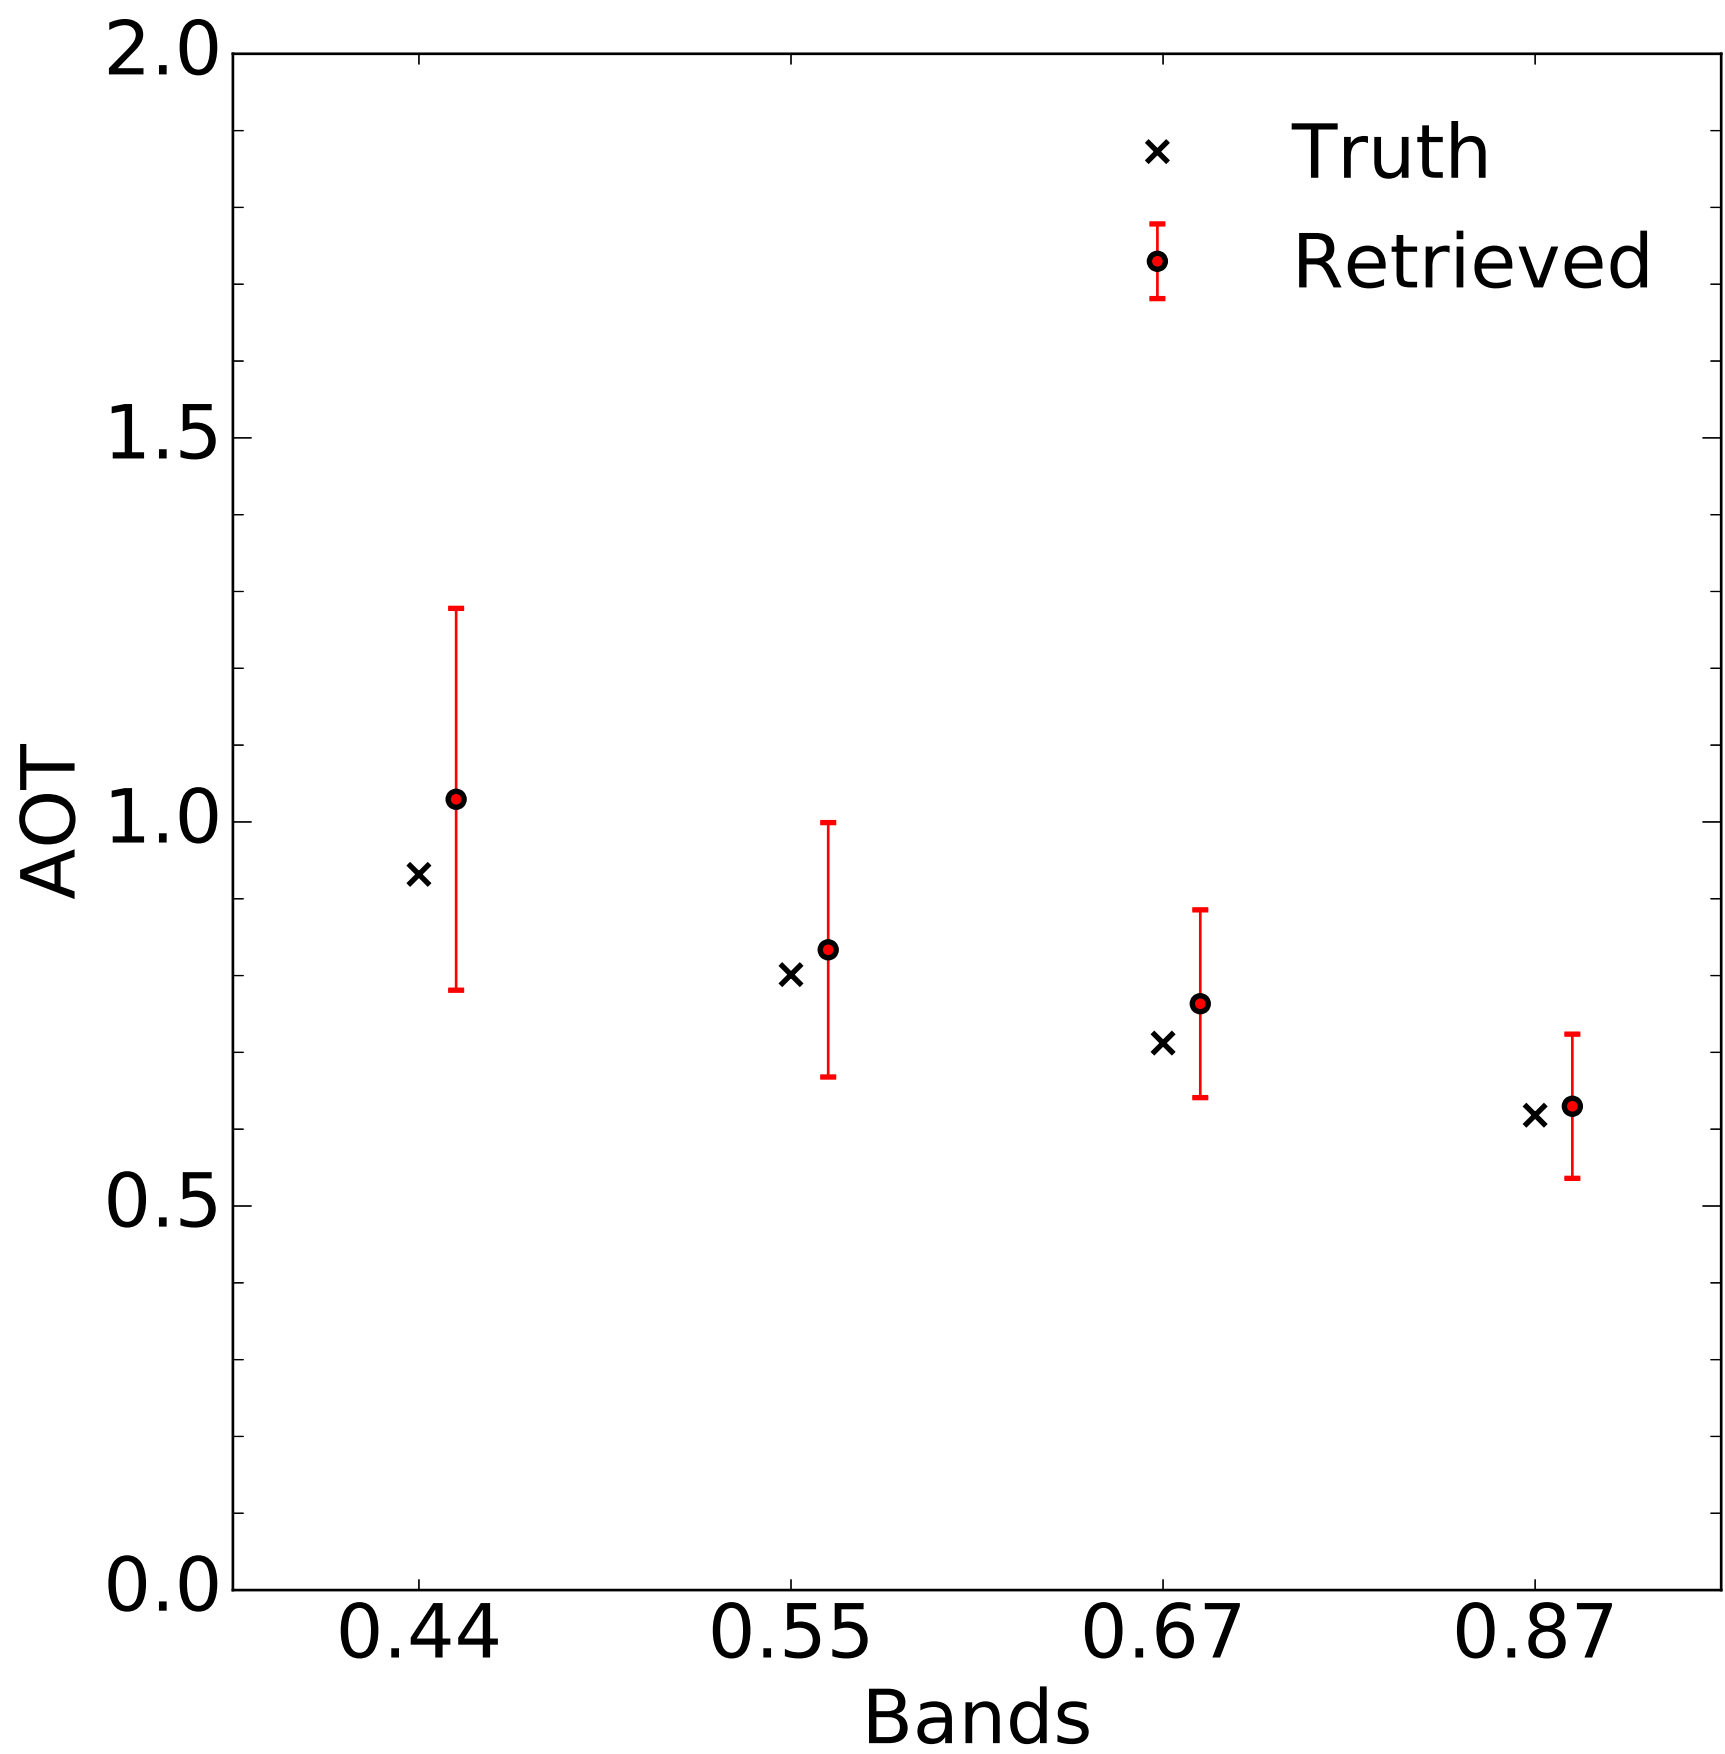

Supplement: Supplementary file 7 [file amt-11-6589-2018-supplement.zip]

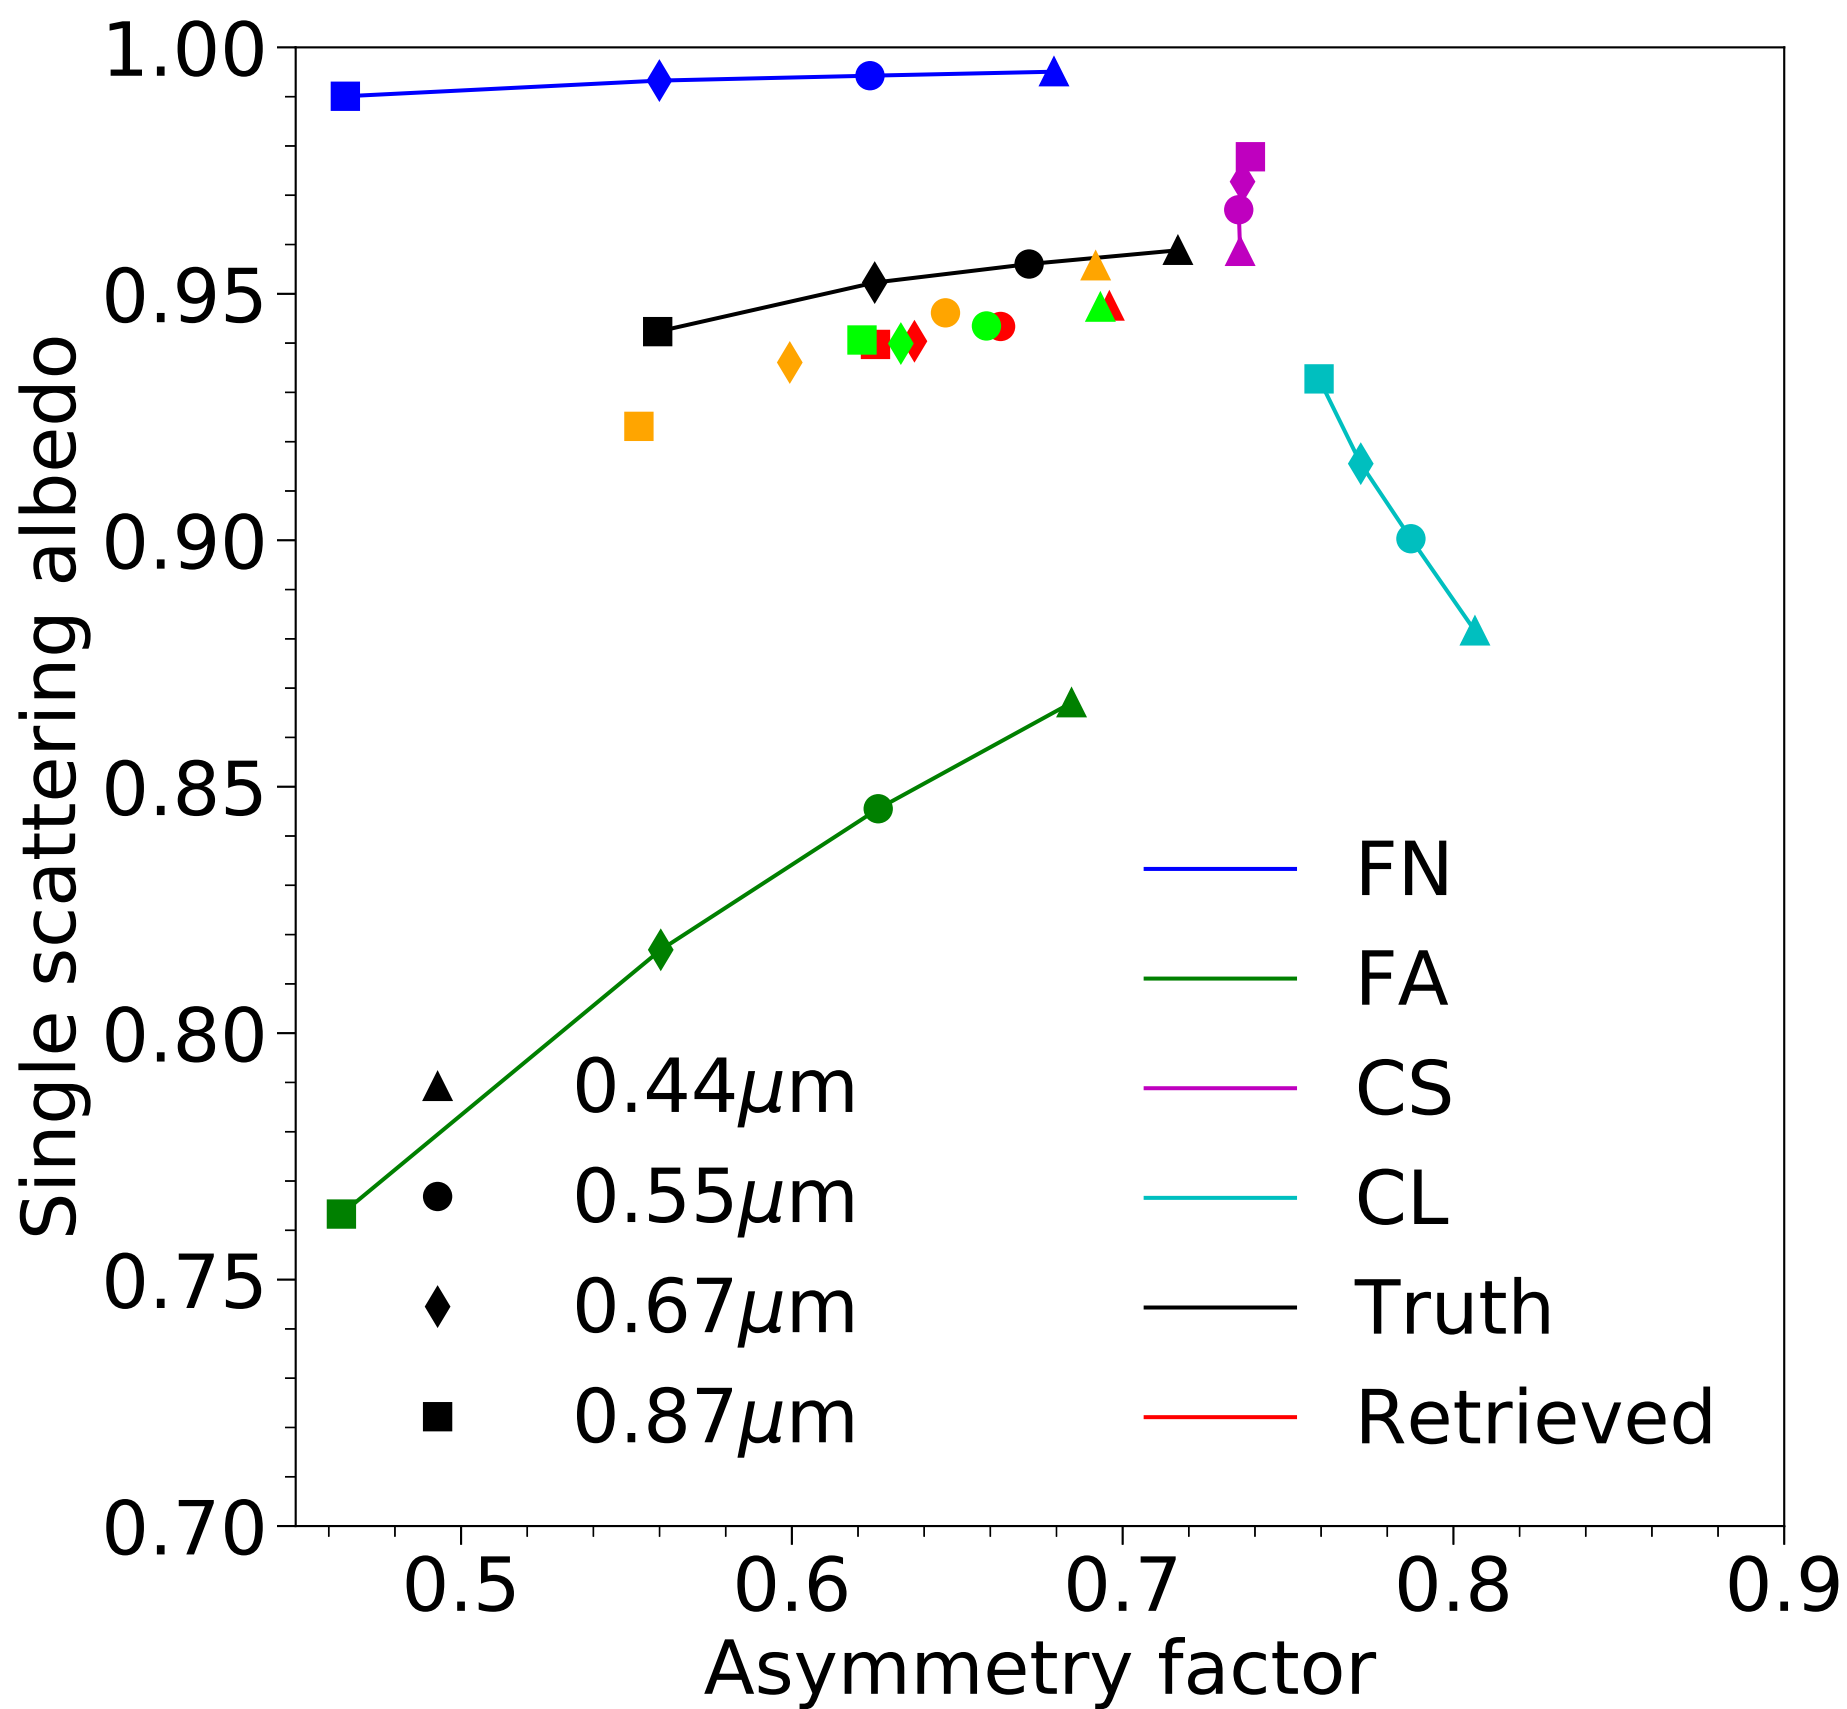

Supplement: Supplementary file 8 [file amt-11-6589-2018-supplement.zip]

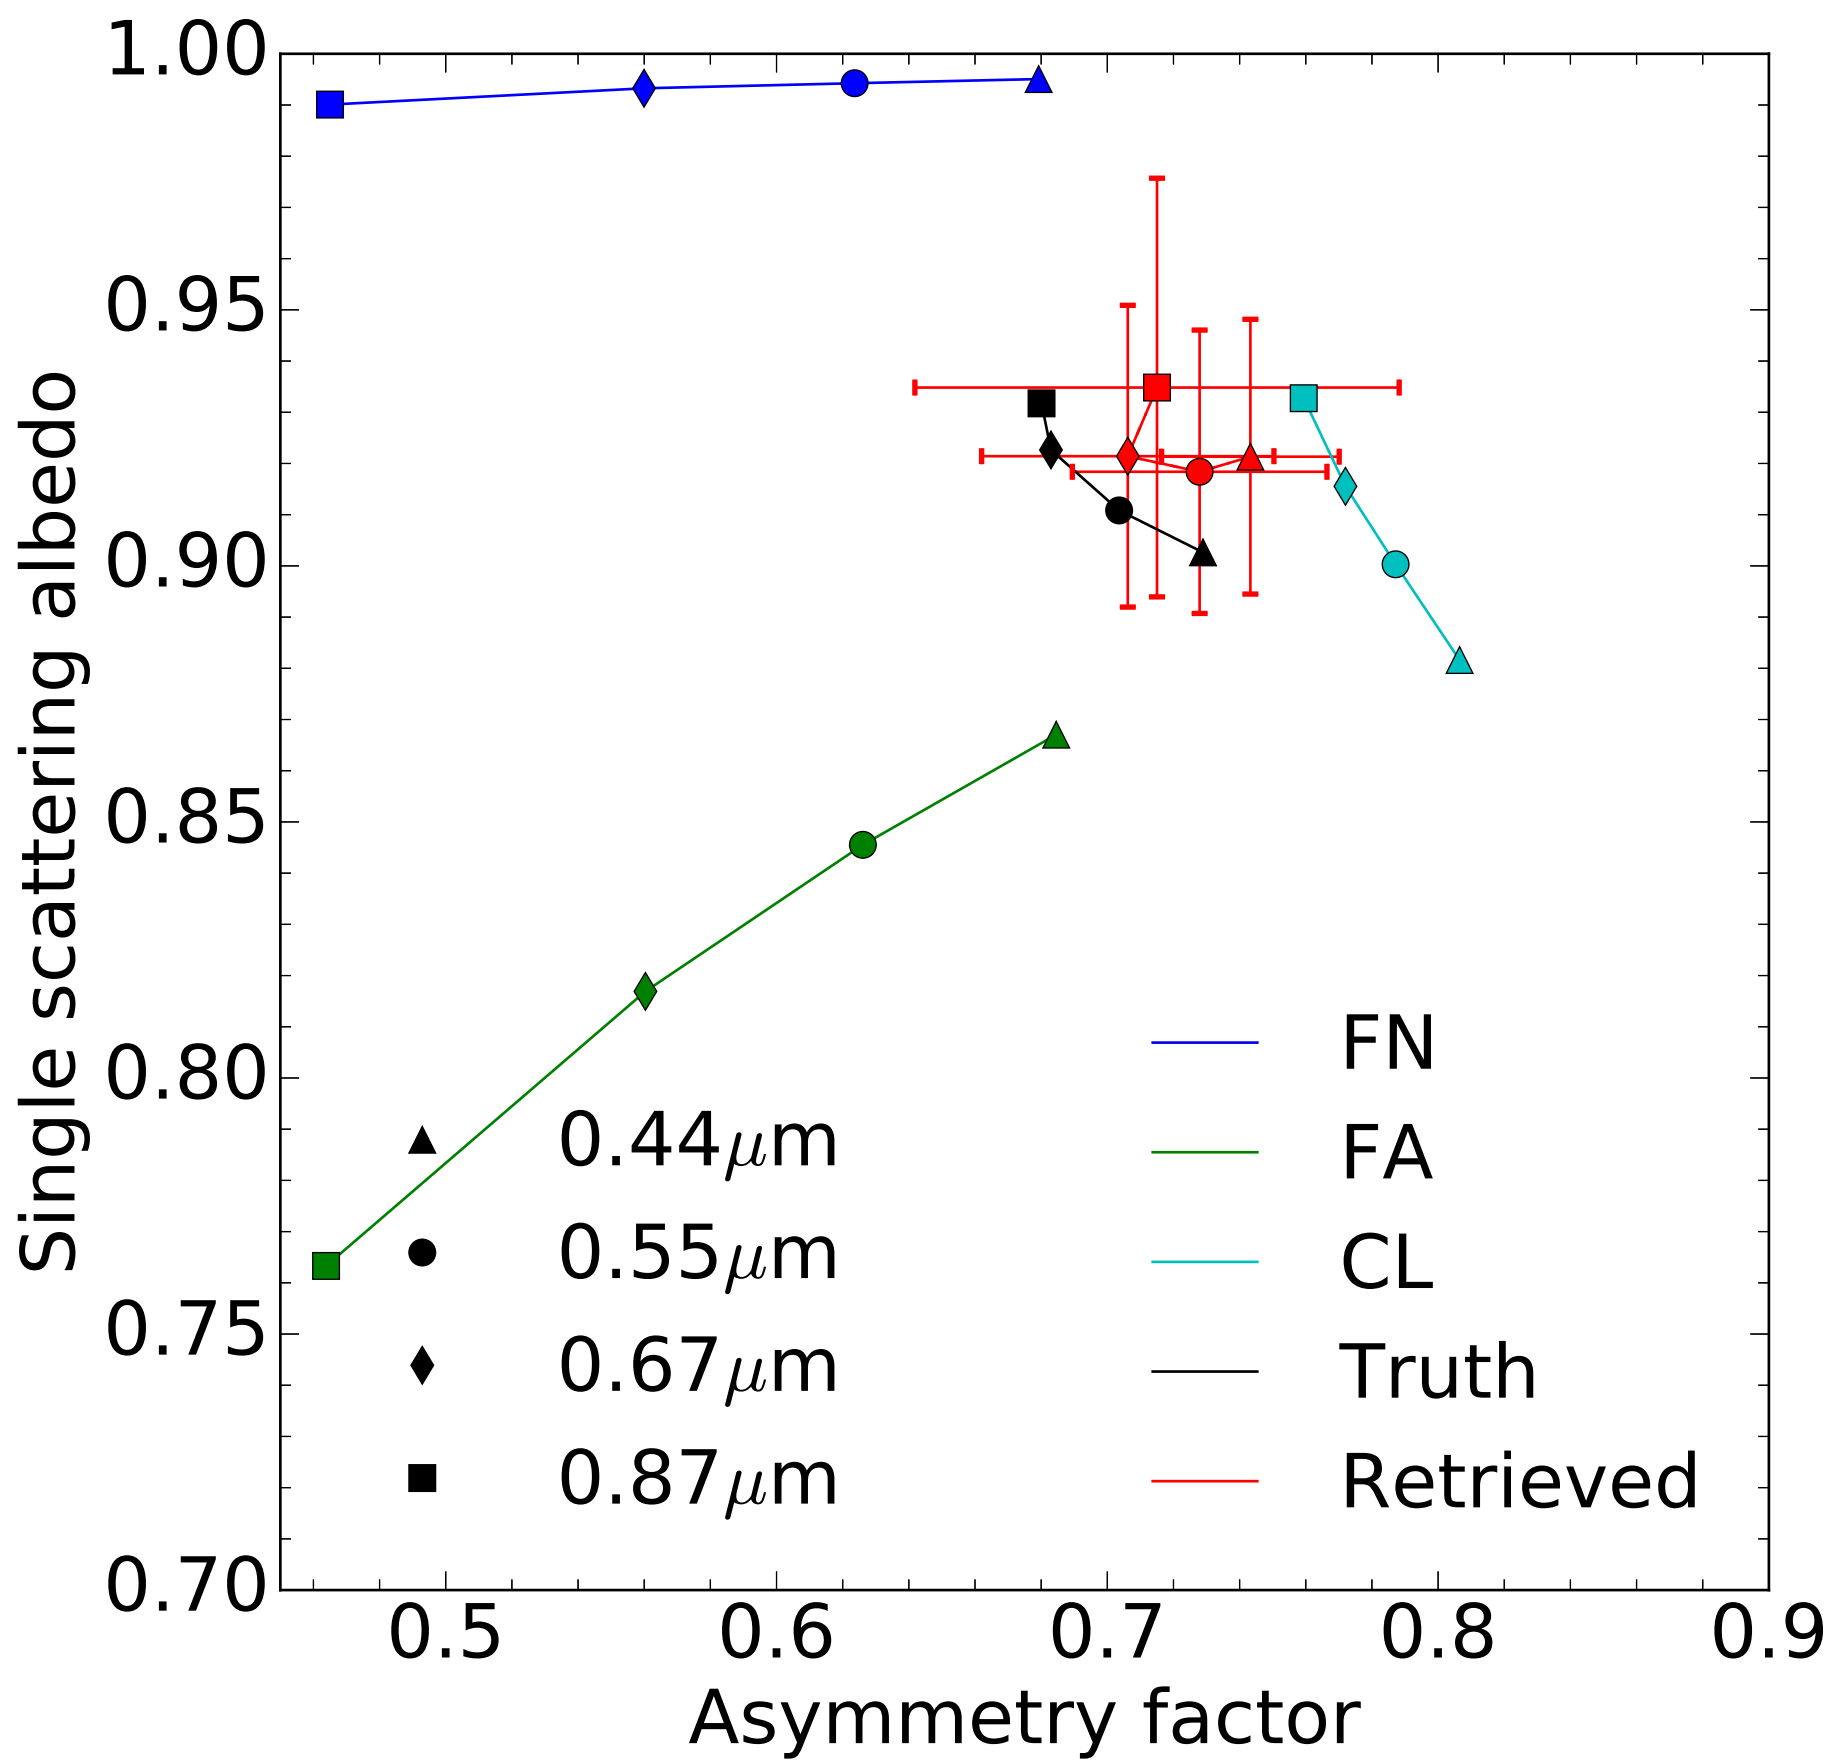

Supplement: Supplementary file 9 [file amt-11-6589-2018-supplement.zip]

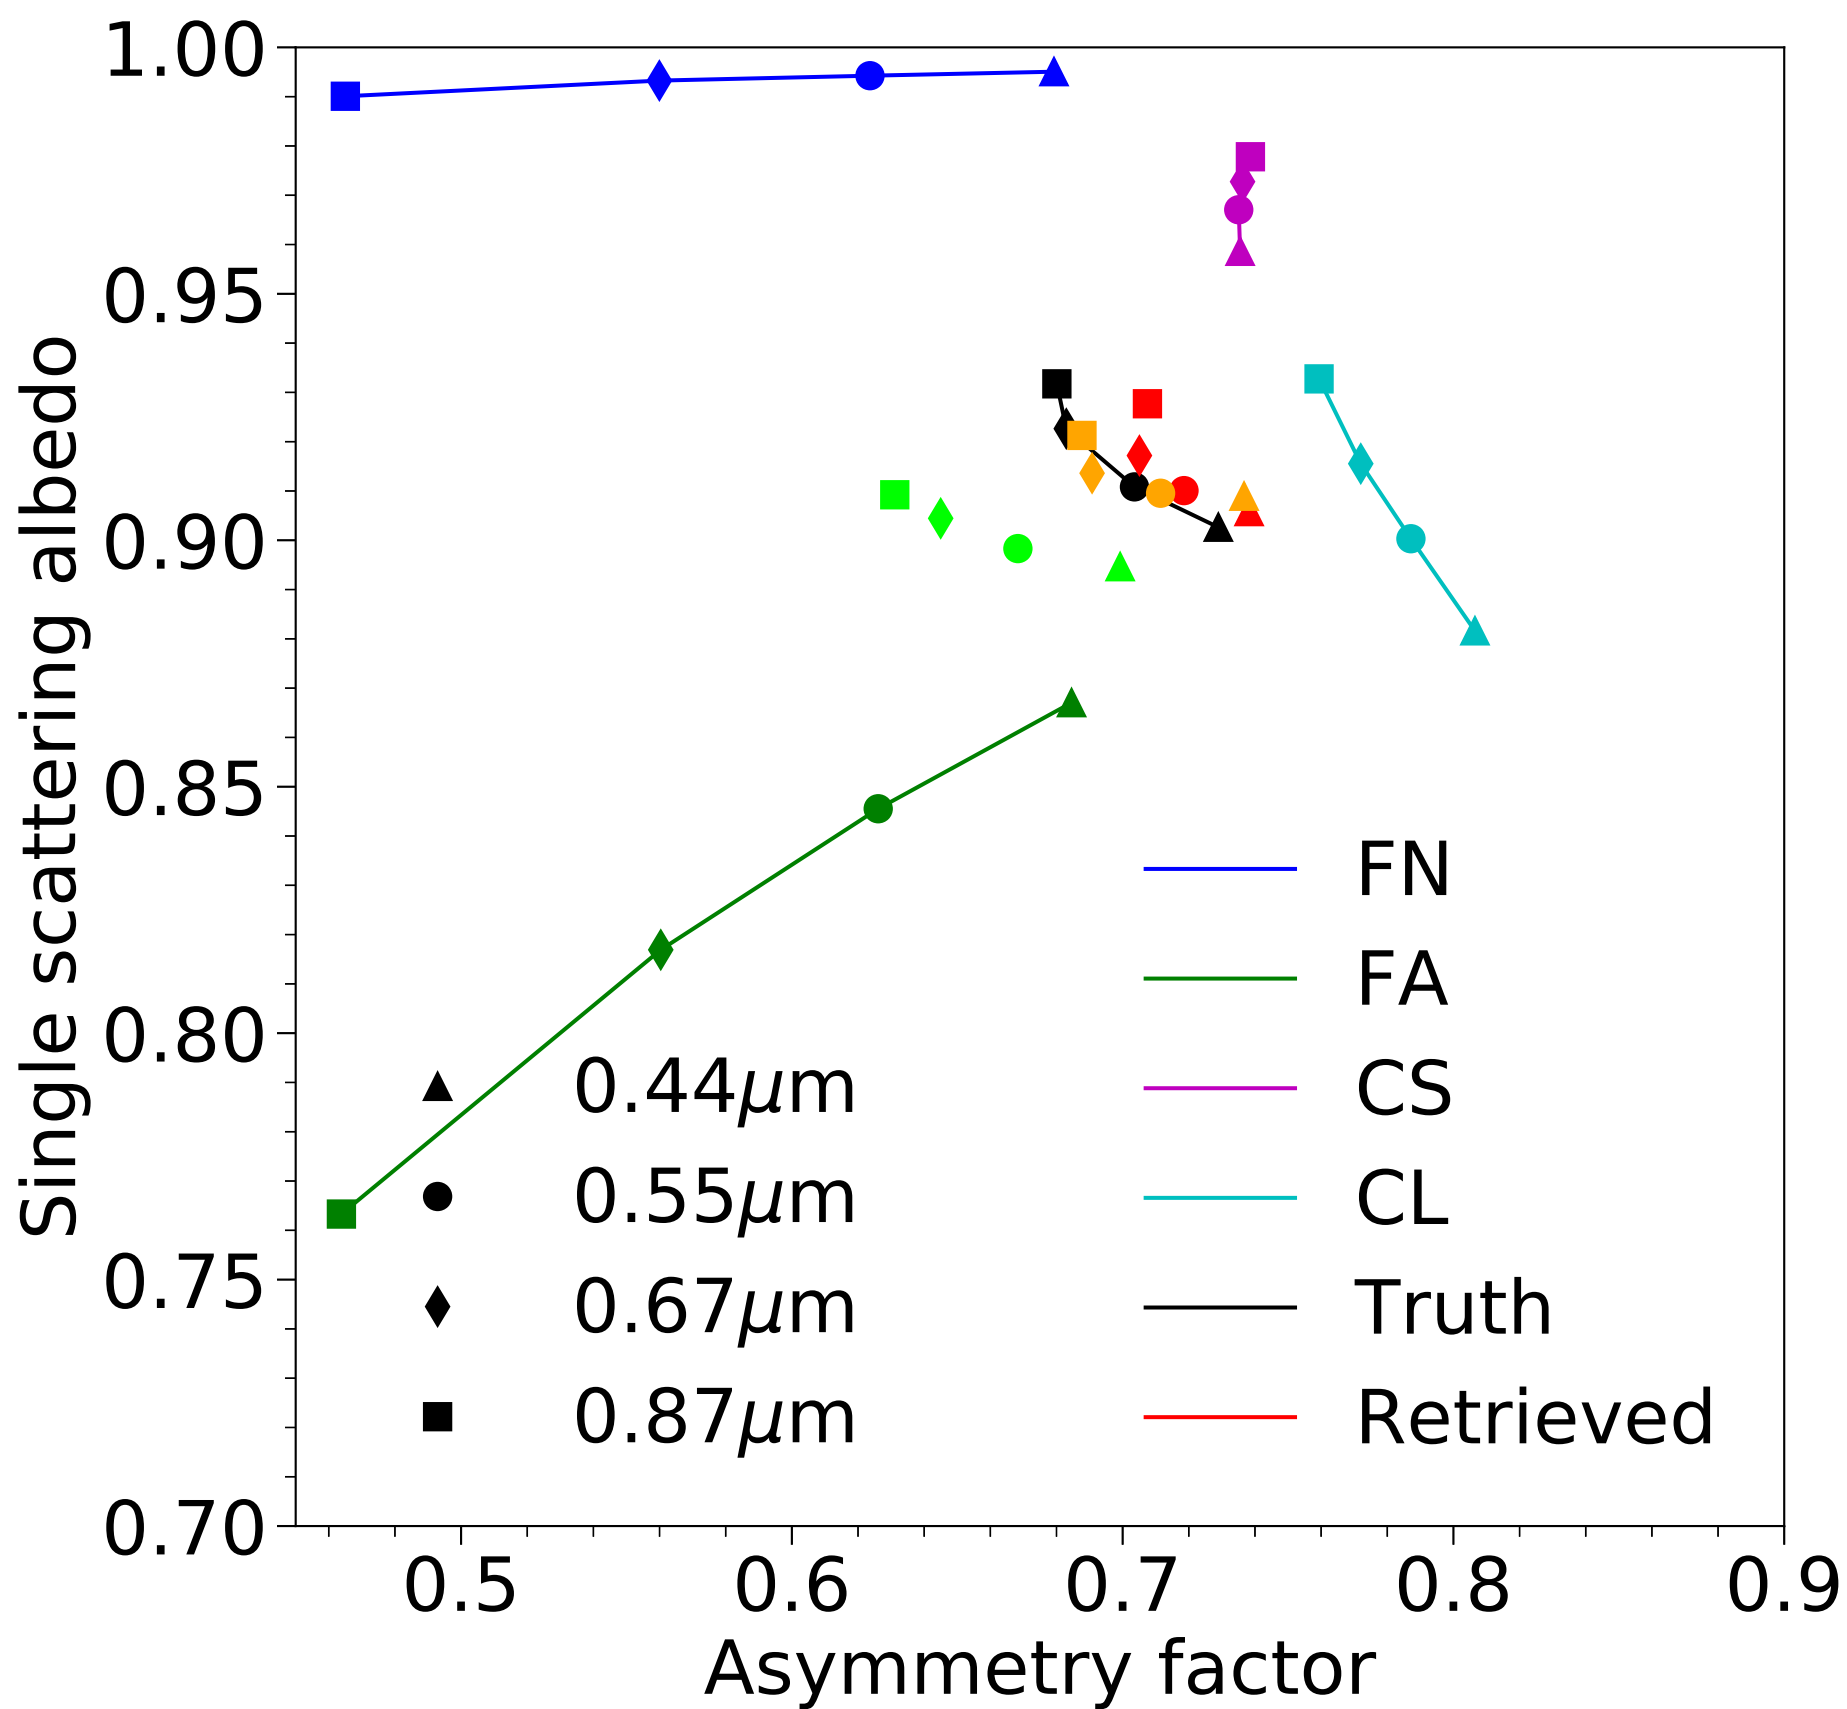

Supplement: Supplementary file 11 [file amt-11-6589-2018-supplement.zip]
